# Supplementary material for: TNFR2 blockade promotes antitumoral immune response in PDAC by targeting activated Treg and reducing T cell exhaustion
Source: PubMed Central journal article supplement — J Immunother Cancer. 2024 Nov 19;12(11):e008898. doi: 10.1136/jitc-2024-008898 (PMC11580249; doi:10.1136/jitc-2024-008898), 2024-11-19
Supplement: jitc-12-11-s002.pdf [file jitc-12-11-s002.pdf]

# TNFR2 blockade promotes anti-tumoral immune response in PDAC by targeting activated Treg and reducing T cell exhaustion

A. Debesset, C. Pilon\*, S. Meunier\*, O. Cuelenaere-Bonizec, W. Richer, A. Thiolat, C. Houpe, M. Ponzo, J. Magnan, J. Caron, P. Caudana, J. Tosello Boari, S. Baulande, N.H. To, B.L. Salomon, E. Piaggio, I. Cascone\*\* and J.L. Cohen\*\*

## TNFR2, a validated target in human PDAC

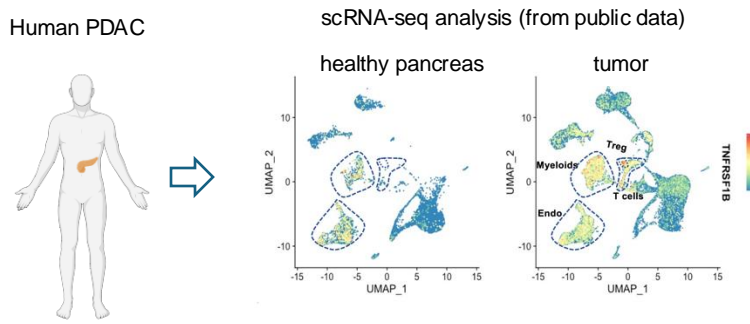

TNFR2 is mainly expressed by Tregs and myeloid cells

## TNFR2, a validated target in PDAC mice

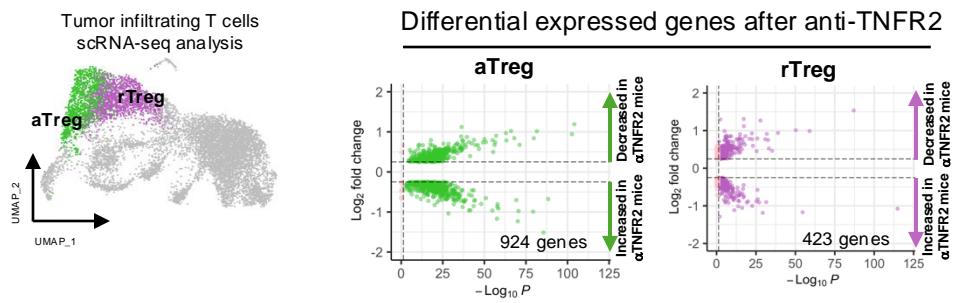

Anti-TNFR2 treatment mainly targets activated Treg

## Identification of a new combination of treatment

### Rational for clinical trial

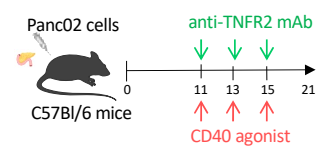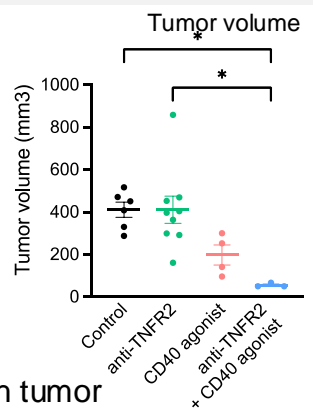

Anti-TNFR2 + agonist anti-CD40 abolish tumor growth and induce a memory immune response
